# Supplementary material for: VEGF: A modifier of the del22q11 (DiGeorge) syndrome?
Source: Springer Nature journal article supplement (doi:10.1038/nm819), 2003-01-21
Supplement: nm819-S6.pdf [file nm819-S6.pdf]

**Supplementary Table 2:** Distribution of *VEGF* gene variations in all *del22q11S* cases and healthy controls

| Genotypes<br>Alleles | All <i>del22q11S</i><br>cases     | Healthy controls                   |                   |                                 |
|----------------------|-----------------------------------|------------------------------------|-------------------|---------------------------------|
|                      | Number<br>(Frequency)<br>(N = 91) | Number<br>(frequency)<br>(N = 316) | P-value           | Crude Odds<br>Ratio<br>(95% CI) |
| -2578C→A             |                                   |                                    |                   |                                 |
| CC                   | 26 (0.29)                         | 97 (0.31)                          | 0.38 <sup>a</sup> | 1.4 (0.8-2.7)                   |
| CA                   | 41 (0.45)                         | 157 (0.50)                         |                   |                                 |
| AA                   | 24 (0.26)                         | 62 (0.20)                          |                   |                                 |
| C                    | 93 (0.51)                         | 351 (0.56)                         | 0.29 <sup>b</sup> | 1.2 (0.9-1.7)                   |
| A                    | 89 (0.49)                         | 281 (0.44)                         |                   |                                 |
| -1154G→A             |                                   |                                    |                   |                                 |
| GG                   | 35 (0.38)                         | 152 (0.48)                         | 0.18 <sup>a</sup> | 1.9 (0.9-3.9)                   |
| AG                   | 42 (0.46)                         | 132 (0.42)                         |                   |                                 |
| AA                   | 14 (0.15)                         | 32 (0.10)                          |                   |                                 |
| G                    | 112 (0.62)                        | 436 (0.69)                         | 0.06 <sup>b</sup> | 1.4 (0.99-<br>2.0)              |
| A                    | 70 (0.38)                         | 196 (0.31)                         |                   |                                 |
| -634G→C              |                                   |                                    |                   |                                 |
| GG                   | 39 (0.43)                         | 147 (0.47)                         | 0.74 <sup>a</sup> | 1.0 (0.4-2.3)                   |
| GC                   | 43 (0.47)                         | 135 (0.43)                         |                   |                                 |
| CC                   | 9 (0.10)                          | 34 (0.11)                          |                   |                                 |
| G                    | 121 (0.66)                        | 429 (0.68)                         | 0.72 <sup>b</sup> | 0.9 (0.7-1.3)                   |
| C                    | 61 (0.34)                         | 203 (0.32)                         |                   |                                 |

Distribution of genotypes and alleles (frequencies in brackets) for the indicated single nucleotide polymorphisms in all *del22q11S* cases and in healthy controls. *P*-values were calculated by comparing *del22q11S* cases to healthy controls using the  $\chi^2$  contingency test with 2 df <sup>a</sup> or 1df <sup>b</sup>.

Odds ratios (95% confidence intervals between brackets) were calculated

relative to the -2578CC, -1154GG or -634CC genotypes or to the -2578C, -1154G or -634C allele.
